**TMPRSS2 and RNA-dependent RNA polymerase are effective targets of therapeutic intervention for treatment of COVID-19 caused by SARS-CoV-2 variants (B.1.1.7 and B.1.351)**

Jihye Lee<sup>1</sup>, JinAh Lee<sup>1†</sup>, Hyeon Ju Kim<sup>1†</sup>, Meehyun Ko<sup>1</sup>, Youngmee Jee<sup>2</sup>, Seungtaek Kim<sup>1\*</sup>

<sup>1</sup> Zoonotic Virus Laboratory, Institut Pasteur Korea, Seongnam, South Korea; <sup>2</sup> CEO office, Institut Pasteur Korea, Seongnam, South Korea

Running title: SARS-CoV-2 variants and drug susceptibility

<sup>†</sup> Both contributed equally to this work.

\* Corresponding author:

Seungtaek Kim, Ph.D.

Zoonotic Virus Laboratory

Institut Pasteur Korea

16, Daewangpangyo-ro 712 beon-gil

Bundang-gu, Seongnam-si

Gyeonggi-do, 13488

South Korea

Tel) 82-31-8018-8230

Fax) 82-31-8018-8014

Email) [seungtaek.kim@ip-korea.org](mailto:seungtaek.kim@ip-korea.org)

## Abstract

SARS-CoV-2 is a causative agent of COVID-19 pandemic and the development of therapeutic interventions is urgently needed. So far, monoclonal antibodies and drug repositioning are the main methods for drug development and this effort was partially successful. Since the beginning of COVID-19 pandemic, the emergence of SARS-CoV-2 variants has been reported in many parts of the world and the main concern is whether the current vaccines and therapeutics are still effective against these variant viruses. The viral entry and viral RNA-dependent RNA polymerase (RdRp) are the main targets of current drug development, thus the inhibitory effects of TMPRSS2 and RdRp inhibitors were compared among the early SARS-CoV-2 isolate (lineage A) and the two recent variants (lineage B.1.1.7 and lineage B.1.351) identified in the UK and South Africa, respectively. Our in vitro analysis of viral replication showed that the drugs targeting TMPRSS2 and RdRp are equally effective against the two variants of concern.

## Introduction

COVID-19 is an emerging infectious disease caused by a novel coronavirus, severe acute respiratory syndrome coronavirus 2 (SARS-CoV-2) (1) and it was declared as a pandemic by the World Health Organization (WHO) on March 11, 2020. In order to address this unprecedented global challenge, intensive investigations have been simultaneously conducted by global scientific communities and industries to develop diagnostic tools, vaccines, and therapeutics. Remarkably, within ten months after release of the SARS-CoV-2 genome sequence, a couple of vaccines were successfully developed and are now being used for vaccination of people after emergency use authorization (EUA). Drug development was also partially successful, especially in the development of monoclonal antibodies (2)(3). Notably, the vaccines and monoclonal antibodies currently being used are heavily dependent on the structure and sequence of viral Spike protein, which is a surface glycoprotein responsible for virus entry by interacting with the host receptor, angiotensin-converting enzyme 2 (ACE2). Thus, if there is any mutation in this protein, it is likely to affect the efficacy of both vaccines and antibodies.

Since the beginning of COVID-19 pandemic, variants of SARS-CoV-2 have been reported in many parts of the world and the recent variants identified in the UK (lineage B.1.1.7), South Africa (lineage B.1.351), and Brazil (lineage P.1) are of particular concern due to multiple mutations in the Spike gene (Figure 1) (4)(5). Indeed, several results are being published, which demonstrated reduced neutralization capacity of convalescent plasma, vaccine sera, and monoclonal antibodies against these variants (6)(7)(8)(9).

In addition to monoclonal antibodies, small molecule inhibitors are also being developed as potential antiviral agents. Targets of such small molecule inhibitors are often transmembrane serine protease 2 (TMPRSS2) (10)(11)(12)(13) and viral RNA-dependent RNA polymerase (RdRp) (14)(15). TMPRSS2 is known to possess serine protease activity, which primes the viral Spike protein for fusion between the viral membrane and the host cell membrane prior to the release of viral genome into the cytoplasm. Camostat and nafamostat are representative drug candidates as TMPRSS2 inhibitors and currently being tested in several phase 2 and 3 clinical trials in many countries. On the other hand, RdRp is a target of remdesivir, which is the first approved drug for treatment of COVID-19 patients (16).

In this study, we investigated whether the antiviral drug candidates targeting TMPRSS2 and

RdRp are still effective against the recent SARS-CoV-2 variants of concern by assessing in vitro viral replication capacity after drug treatment.

## Results and Discussion

The alignment of SARS-CoV-2 amino acid sequences of two lineages (B.1.1.7 and B.1.351) identified numerous changes compared to the sequence of the early SARS-CoV-2 isolate (lineage A) and several of them were located in the Spike protein (Figure 1) while no change was observed in the NSP12 amino acid sequence which possesses an RdRp activity.

In order to compare the drug susceptibilities against the three lineages of SARS-CoV-2, both Vero and Calu-3 cells were used for virus infection and drug treatment. Drugs were added to the cells prior to the virus infection. The cells were fixed at 24 h post infection and scored by immunofluorescence analysis with an antibody specific for the viral N protein. The microscopic images of both viral N protein and cell nuclei were analyzed using the Columbus software and the dose-response curve (DRC) for each drug and variant was generated (Figures 2 and 3).

We tested four different TMPRSS2 inhibitors (camostat, nafamostat, aprotinin, and bromhexine) (17), two RdRp inhibitors (remdesivir, EIDD-2801 (molnupiravir), and EIDD-1931 (an active form of EIDD-2801)) (14)(15), and others (niclosamide and ciclesonide) that we had identified in our earlier drug repositioning study (13)(18). The antiviral drug efficacy of each drug was compared among the three lineages of SARS-CoV-2; A (an early SARS-CoV-2 isolate), B.1.1.7 (identified in the UK) and B.1.351 (identified in South Africa).

While TMPRSS2 inhibitors did not show any antiviral effect in Vero cells as reported previously (Figure 2) (13), they were very effective in suppressing viral replication in Calu-3 cells, perhaps due to the abundant TMPRSS2 expression in this cell line (19) without substantial differences in drug efficacy among the three lineages of SARS-CoV-2 (Figure 3). TMPRSS2 cleaves the Spike protein at the S2' cleavage site and no sequence change was observed at or near this site in the two recent variants (B.1.1.7 and B.1.351) compared to the sequence of the early SARS-CoV-2 isolate (lineage A) (Figure 1). Perhaps, the conserved sequence at this region could account for the similar drug efficacy among the three lineages.

The amino acid sequence of NSP12 was also well conserved among the three lineages of

SARS-CoV-2 (Figure 1) and we did not find any substantial differences among them with regard to drug efficacy of the two representative RdRp inhibitors (remdesivir and molnupiravir) (Figures 2 and 3). Both remdesivir and molnupiravir are nucleoside analogs but the two drugs differ from each other in that remdesivir works as a chain terminator but molnupiravir induces mutations during viral RNA replication. Molnupiravir (EIDD-2801) is a prodrug of  $\beta$ -D-N<sup>4</sup>-hydroxycytidine (EIDD-1931) and it has well-known broad-spectrum antiviral activity against various RNA viruses (20)(21)(22)(23). Since this drug is orally available, it could be easily administered for the patients even with mild COVID-19 if it is successfully developed. Currently, phase 2 and 3 clinical trials are being conducted globally for this new drug candidate.

Finally, we assessed the antiviral drug efficacy of niclosamide and ciclesonide and no substantial differences in drug efficacy was observed among the three lineages (Figures 2 and 3). This result suggests that the potential targets of these drugs lie outside of the substituted amino acids in the two variants. Currently, niclosamide and ciclesonide are being tested in several clinical trials to assess antiviral efficacy against SARS-CoV-2 infection.

Most of monoclonal antibodies, convalescent plasma, and vaccines that are being used for treatment or prevention of COVID-19 were developed to target the viral Spike protein, specifically, the receptor-binding domain. While this protein is abundant and more immunogenic than the other viral proteins, it is also the place where many mutations occur (e.g., N501Y, E484K, K417N) due to potential viral adaptations and various selective pressures, etc. Of these mutations, some are known to substantially reduce neutralization capacity of monoclonal antibodies, convalescent plasma, and vaccine sera. Hence, it is very important to develop therapeutics targeting viral or host factors other than the Spike protein in order to address potential resistance issues caused by the Spike mutations.

In summary, we analyzed efficacy of potential drug candidates (i.e., TMPRSS2 inhibitors, RdRp inhibitors and others) against the recent SARS-CoV-2 variants of concern and we found that all of them were equally effective in suppressing replication of B.1.1.7 and B.1.351 variants compared to the early SARS-CoV-2 isolate. The results from this study would help develop therapeutic interventions specifically targeting TMPRSS2, RdRp or other viral and host factors.

## **Materials and Methods**

### **Virus and cells**

Vero and Vero E6 cells were obtained from the American Type Culture Collection (ATCC CCL-81 and C1008, respectively) and maintained at 37°C with 5% CO<sub>2</sub> in Dulbecco's modified Eagle's medium (DMEM; Welgene), supplemented with 10% heat-inactivated fetal bovine serum (FBS) and 2% antibiotic-antimycotic solution (Gibco). Calu-3 used in this study is a clonal isolate, which shows higher growth rate compared with the parental Calu-3 obtained from the American Type Culture Collection (ATCC, HTB-55). Calu-3 was maintained at 37°C with 5% CO<sub>2</sub> in Eagle's Minimum Essential Medium (EMEM, ATCC) supplemented with 20% heat-inactivated fetal bovine serum (FBS), 1% MEM-Non-Essential Amino Acid solution (Gibco) and 2% antibiotic-antimycotic solution (Gibco). Three lineages of SARS-CoV-2 were provided by Korea Disease Control and Prevention Agency (KDCA), and were propagated in Vero E6 cells. Each lineage is noted as lineage A (an early SARS-CoV-2 isolate) (hCoV-19/Korea/KCDC03/2020), lineage B.1.1.7 (hCoV-19/Korea/KDCA51463/2021), and lineage B.1.351 (hCoV-19/Korea/KDCA55905/2021) in this study. Viral titers were determined by plaque assays in Vero cells. All experiments using SARS-CoV-2 were performed at Institut Pasteur Korea in compliance with the guidelines of the KNIH, using enhanced biosafety level 3 (BSL-3) containment procedures in laboratories approved for use by the KDCA.

### **Reagents**

All compounds except for ciclesonide and EIDD-1931 were purchased from MedChemExpress (Monmouth Junction, NJ). Ciclesonide and EIDD-1931 were purchased from Cayman Chemical (Ann Arbor, MI). Stock solution was dissolved in dimethyl sulfoxide (DMSO) at 10mM concentration. Anti-SARS-CoV-2 N protein antibody was purchased from Sino Biological Inc (Beijing, China). Alexa Fluor 488 goat anti-rabbit IgG (H + L) secondary antibody and Hoechst 33342 were purchased from Molecular Probes. Paraformaldehyde (PFA) (32% aqueous solution) and normal goat serum were purchased from Electron Microscopy Sciences (Hatfield, PA) and Vector Laboratories, Inc (Burlingame, CA), respectively.

### **Dose-response curve (DRC) analysis**

Vero cells were seeded at  $1.0 \times 10^4$  cells per well with Dulbecco's modified Eagle's medium (DMEM; Welgene) supplemented with 2% heat-inactivated fetal bovine serum (FBS) and 2% antibiotic-antimycotic solution (Gibco) in a black, 384-well,  $\mu$ Clear plates (Greiner Bio-One) 24 hours before the experiment. Calu-3 cells were seeded at  $2.0 \times 10^4$  cells per well with Eagle's Minimum Essential Medium (EMEM, ATCC) supplemented with 20% heat-inactivated fetal bovine serum (FBS), 1% MEM-Non-Essential Amino Acid solution (Gibco) and 2% antibiotic-antimycotic solution (Gibco) in a black, 384-well,  $\mu$ Clear plates (Greiner Bio-One) 24 hours before the experiment. Ten-point DRCs were generated with three-fold dilutions, with compound concentrations ranging from 0.0025 to 50  $\mu$ M. Only nafamostat and camostat used a top concentration of 5  $\mu$ M instead of 50  $\mu$ M, thus concentrations ranged from 0.00025 to 50  $\mu$ M. For viral infection, plates were transferred into the BSL-3 containment facility and SARS-CoV-2 was added at a multiplicity of infection of 0.008 for Vero cells and 0.2 for Calu-3 cells. The plates were incubated at 37°C for 24 hours. The cells were fixed at 24 hours post infection (hpi) with 4% paraformaldehyde (PFA), permeabilized with 0.25% Triton X-100 solution. Anti-SARS-CoV-2 nucleocapsid (N) primary antibody, 488-conjugated goat anti-rabbit IgG secondary antibody and Hoechst 33342 were treated to the cells for immunofluorescence. The images acquired with Operetta high-throughput imaging device (Perkin Elmer) were analyzed using the Columbus software (Perkin Elmer) to quantify cell numbers and infection ratios. Antiviral activity was normalized to infection control (0.5% DMSO) in each assay plate. Cell viability was measured by counting nuclei in each well and normalizing it to the mock control. DRCs were generated using Prism7 software (GraphPad). IC<sub>50</sub> values were calculated using nonlinear regression analysis – log[inhibitor] vs. response – Variable slope (four parameters). All IC<sub>50</sub> and CC<sub>50</sub> values were measured in duplicates.

## Acknowledgements

The pathogen resources (NCCP43326, NCCP43381, and NCCP43382) for this study were provided by the National Culture Collection for Pathogens. This work was supported by the National Research Foundation of Korea (NRF) grant funded by the Korean government (MSIT) (NRF-2017M3A9G6068245, NRF-2020M3E9A1041756, and NRF-2020M3A9I2081692).



# References

1. Zhou P, Yang X-L, Wang X-G, Hu B, Zhang L, Zhang W, Si H-R, Zhu Y, Li B, Huang C-L, Chen H-D, Chen J, Luo Y, Guo H, Jiang R-D, Liu M-Q, Chen Y, Shen X-R, Wang X, Zheng X-S, Zhao K, Chen Q-J, Deng F, Liu L-L, Yan B, Zhan F-X, Wang Y-Y, Xiao G-F, Shi Z-L. 2020. A pneumonia outbreak associated with a new coronavirus of probable bat origin. *Nature* 579:270–273.
2. Chen P, Nirula A, Heller B, Gottlieb RL, Boschia J, Morris J, Huhn G, Cardona J, Mocherla B, Stosor V, Shawa I, Adams AC, Van Naarden J, Custer KL, Shen L, Durante M, Oakley G, Schade AE, Sabo J, Patel DR, Klekotka P, Skovronsky DM. 2021. SARS-CoV-2 Neutralizing Antibody LY-CoV555 in Outpatients with Covid-19. *N Engl J Med* 384:229–237.
3. Weinreich DM, Sivapalasingam S, Norton T, Ali S, Gao H, Bhore R, Musser BJ, Soo Y, Rofail D, Im J, Perry C, Pan C, Hosain R, Mahmood A, Davis JD, Turner KC, Hooper AT, Hamilton JD, Baum A, Kyratsous CA, Kim Y, Cook A, Kampman W, Kohli A, Sachdeva Y, Graber X, Kowal B, DiCioccio T, Stahl N, Lipsich L, Braunstein N, Herman G, Yancopoulos GD. 2021. REGN-COV2, a Neutralizing Antibody Cocktail, in Outpatients with Covid-19. *N Engl J Med* 384:238–251.
4. Fontanet A, Autran B, Lina B, Kieny MP, Karim SSA, Sridhar D. 2021. SARS-CoV-2 variants and ending the COVID-19 pandemic. *Lancet (London, England)* 397:952–954.
5. Mascola JR, Graham BS, Fauci AS. 2021. SARS-CoV-2 Viral Variants-Tackling a Moving Target. *JAMA*.
6. Greaney AJ, Loes AN, Crawford KHD, Starr TN, Malone KD, Chu HY, Bloom JD. 2021. Comprehensive mapping of mutations in the SARS-CoV-2 receptor-binding domain that affect recognition by polyclonal human plasma antibodies. *Cell Host Microbe* 29:463-476.e6.
7. Liu Z, VanBlargan LA, Bloyet L-M, Rothlauf PW, Chen RE, Stumpf S, Zhao H, Errico JM, Theel ES, Liebeskind MJ, Alford B, Buchser WJ, Ellebedy AH, Fremont DH, Diamond MS, Whelan SPJ. 2021. Identification of SARS-CoV-2 spike mutations that attenuate monoclonal and serum antibody neutralization. *Cell Host Microbe* 29:477-488.e4.



8. Thomson EC, Rosen LE, Shepherd JG, Spreafico R, da Silva Filipe A, Wojcechowskyj JA, Davis C, Piccoli L, Pascall DJ, Dillen J, Lytras S, Czudnochowski N, Shah R, Meury M, Jesudason N, De Marco A, Li K, Bassi J, O'Toole A, Pinto D, Colquhoun RM, Culap K, Jackson B, Zatta F, Rambaut A, Jaconi S, Sreenu VB, Nix J, Zhang I, Jarrett RF, Glass WG, Beltramello M, Nomikou K, Pizzuto M, Tong L, Cameroni E, Croll TI, Johnson N, Di Iulio J, Wickenhagen A, Ceschi A, Harbison AM, Mair D, Ferrari P, Smollett K, Sallusto F, Carmichael S, Garzoni C, Nichols J, Galli M, Hughes J, Riva A, Ho A, Schiuma M, Semple MG, Openshaw PJM, Fadda E, Baillie JK, Chodera JD, Rihn SJ, Lycett SJ, Virgin HW, Telenti A, Corti D, Robertson DL, Snell G. 2021. Circulating SARS-CoV-2 spike N439K variants maintain fitness while evading antibody-mediated immunity. *Cell* 184:1171-1187.e20.
9. Wang Z, Schmidt F, Weisblum Y, Muecksch F, Barnes CO, Finkin S, Schaefer-Babajew D, Cipolla M, Gaebler C, Lieberman JA, Oliveira TY, Yang Z, Abernathy ME, Huey-Tubman KE, Hurley A, Turroja M, West KA, Gordon K, Millard KG, Ramos V, Da Silva J, Xu J, Colbert RA, Patel R, Dizon J, Unson-O'Brien C, Shimeliovich I, Gazumyan A, Caskey M, Bjorkman PJ, Casellas R, Hatzioannou T, Bieniasz PD, Nussenzweig MC. 2021. mRNA vaccine-elicited antibodies to SARS-CoV-2 and circulating variants. *Nature* 1–7.
10. Hoffmann M, Kleine-Weber H, Schroeder S, Krüger N, Herrler T, Erichsen S, Schiergens TS, Herrler G, Wu N-H, Nitsche A, Müller MA, Drosten C, Pöhlmann S. 2020. SARS-CoV-2 Cell Entry Depends on ACE2 and TMPRSS2 and Is Blocked by a Clinically Proven Protease Inhibitor. *Cell* 181:271-280.e8.
11. Hoffmann M, Schroeder S, Kleine-Weber H, Müller MA, Drosten C, Pöhlmann S. 2020. Nafamostat Mesylate Blocks Activation of SARS-CoV-2: New Treatment Option for COVID-19. *Antimicrob Agents Chemother* 64:e00754-20.
12. Yamamoto M, Kiso M, Sakai-Tagawa Y, Iwatsuki-Horimoto K, Imai M, Takeda M, Kinoshita N, Ohmagari N, Gohda J, Semba K, Matsuda Z, Kawaguchi Y, Kawaoka Y, Inoue J. 2020. The Anticoagulant Nafamostat Potently Inhibits SARS-CoV-2 S Protein-Mediated Fusion in a Cell Fusion Assay System and Viral Infection In Vitro in a Cell-Type-Dependent Manner. *Viruses* 12:629.
13. Ko M, Jeon S, Ryu W, Kim S. 2021. Comparative analysis of antiviral efficacy of

- FDA-approved drugs against SARS-CoV-2 in human lung cells. *J Med Virol* 93:1403–1408.
14. Sheahan TP, Sims AC, Graham RL, Menachery VD, Gralinski LE, Case JB, Leist SR, Pirc K, Feng JY, Trantcheva I, Bannister R, Park Y, Babusis D, Clarke MO, Mackman RL, Spahn JE, Palmiotti CA, Siegel D, Ray AS, Cihlar T, Jordan R, Denison MR, Baric RS. 2017. Broad-spectrum antiviral GS-5734 inhibits both epidemic and zoonotic coronaviruses. *Sci Transl Med* 9:eal3653.
15. Sheahan TP, Sims AC, Zhou S, Graham RL, Pruijssers AJ, Agostini ML, Leist SR, Schäfer A, Dinno KH, Stevens LJ, Chappell JD, Lu X, Hughes TM, George AS, Hill CS, Montgomery SA, Brown AJ, Bluemling GR, Natchus MG, Saindane M, Kolykhalov AA, Painter G, Harcourt J, Tamin A, Thornburg NJ, Swanstrom R, Denison MR, Baric RS. 2020. An orally bioavailable broad-spectrum antiviral inhibits SARS-CoV-2 in human airway epithelial cell cultures and multiple coronaviruses in mice. *Sci Transl Med* 12:eabb5883.
16. Beigel JH, Tomashek KM, Dodd LE, Mehta AK, Zingman BS, Kalil AC, Hohmann E, Chu HY, Luetkemeyer A, Kline S, Lopez de Castilla D, Finberg RW, Dierberg K, Tapson V, Hsieh L, Patterson TF, Paredes R, Sweeney DA, Short WR, Touloumi G, Lye DC, Ohmagari N, Oh M, Ruiz-Palacios GM, Benfield T, Fätkenheuer G, Kortepeter MG, Atmar RL, Creech CB, Lundgren J, Babiker AG, Pett S, Neaton JD, Burgess TH, Bonnett T, Green M, Makowski M, Osinusi A, Nayak S, Lane HC. 2020. Remdesivir for the Treatment of Covid-19 — Final Report. *N Engl J Med* 383:1813–1826.
17. Shen LW, Mao HJ, Wu YL, Tanaka Y, Zhang W. 2017. TMPRSS2: A potential target for treatment of influenza virus and coronavirus infections. *Biochimie* 142:1–10.
18. Jeon S, Ko M, Lee J, Choi I, Byun SY, Park S, Shum D, Kim S. 2020. Identification of antiviral drug candidates against SARS-CoV-2 from FDA-approved drugs. *Antimicrob Agents Chemother* 64:e00819-20.
19. Murgolo N, Therien AG, Howell B, Klein D, Koeplinger K, Lieberman LA, Adam GC, Flynn J, McKenna P, Swaminathan G, Hazuda DJ, Olsen DB. 2021. SARS-CoV-2 tropism, entry, replication, and propagation: Considerations for drug discovery and

development. PLoS Pathog 17:e1009225.

20. Reynard O, Nguyen X-N, Alazard-Dany N, Barateau V, Cimorelli A, Volchkov V. 2015. Identification of a New Ribonucleoside Inhibitor of Ebola Virus Replication. *Viruses* 7:6233–6240.
21. Urakova N, Kuznetsova V, Crossman DK, Sokratian A, Guthrie DB, Kolykhalov AA, Lockwood MA, Natchus MG, Crowley MR, Painter GR, Frolova EI, Frolov I. 2018.  $\beta$ -d-N4-Hydroxycytidine Is a Potent Anti-alphavirus Compound That Induces a High Level of Mutations in the Viral Genome. *J Virol* 92:e01965-17.
22. Toots M, Yoon JJ, Cox RM, Hart M, Sticher ZM, Makhsous N, Plesker R, Barrena AH, Reddy PG, Mitchell DG, Shean RC, Bluemling GR, Kolykhalov AA, Greninger AL, Natchus MG, Painter GR, Plemper RK. 2019. Characterization of orally efficacious influenza drug with high resistance barrier in ferrets and human airway epithelia. *Sci Transl Med* 11:5866.
23. Agostini ML, Pruijssers AJ, Chappell JD, Gribble J, Lu X, Andres EL, Bluemling GR, Lockwood MA, Sheahan TP, Sims AC, Natchus MG, Saindane M, Kolykhalov AA, Painter GR, Baric RS, Denison MR. 2019. Small-Molecule Antiviral  $\beta$ -D- N 4 - Hydroxycytidine Inhibits a Proofreading-Intact Coronavirus with a High Genetic Barrier to Resistance. *J Virol* 93:e01348-19.

## Figure Legends

**Figure 1.** Schematic illustration of single-nucleotide polymorphisms (SNPs) in SARS-CoV-2 variants. Three SARS-CoV-2 lineages were used in this study; lineage A (an early SARS-CoV-2 isolate), lineage B.1.1.7 (identified in the UK), and lineage B.1.351 (identified in South Africa). SNPs that are observed in B.1.351 compared to the early isolate are noted in red above the diagram. SNPs observed in B.1.1.7 compared to the early isolate are noted in green below the diagram. NTD (N-terminal domain); RBD (receptor-binding domain); FP (fusion peptide); IFP (internal fusion peptide); HR1 (heptad repeat 1); HR2 (heptad repeat 2); TM (transmembrane anchor); CT (cytoplasmic tail)

**Figure 2.** Dose-response curve analysis in Vero cells for the 9 drugs that were tested in this study. The red circles (lineage A), blue diamonds (lineage B.1.1.7), and green triangles (lineage B.1.351) represent inhibition of SARS-CoV-2 infection (%) in the presence of increasing concentrations of each drug, and the black squares represent cell viability (%). Means  $\pm$  SD were calculated from duplicate experiments.

**Figure 3.** Dose-response curve analysis in Calu-3 cells for the 9 drugs that were tested in this study. The red circles (lineage A), blue diamonds (lineage B.1.1.7), and green triangles (lineage B.1.351) represent inhibition of SARS-CoV-2 infection (%) in the presence of increasing concentrations of each drug, and the black squares represent cell viability (%). Means  $\pm$  SD were calculated from duplicate experiments.

Figure 1

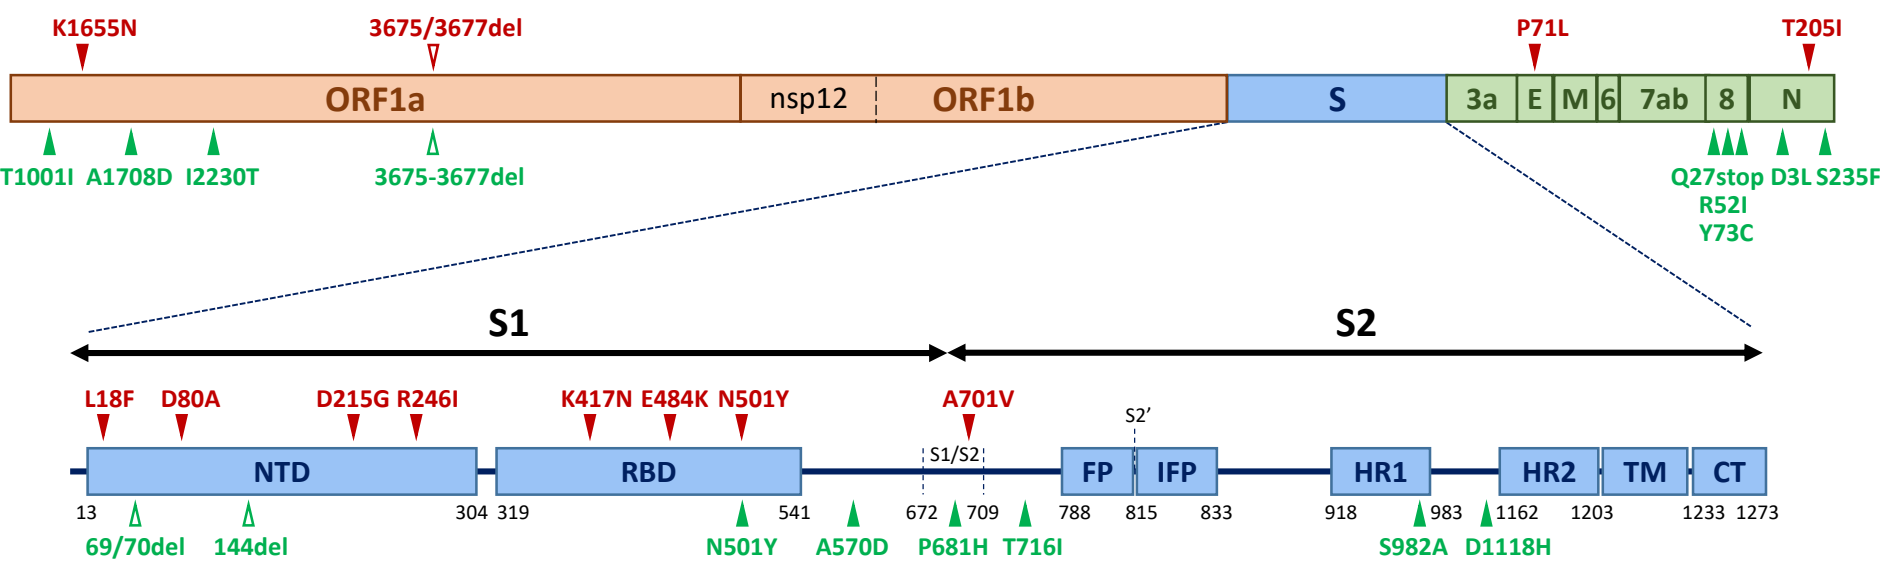

Figure 2

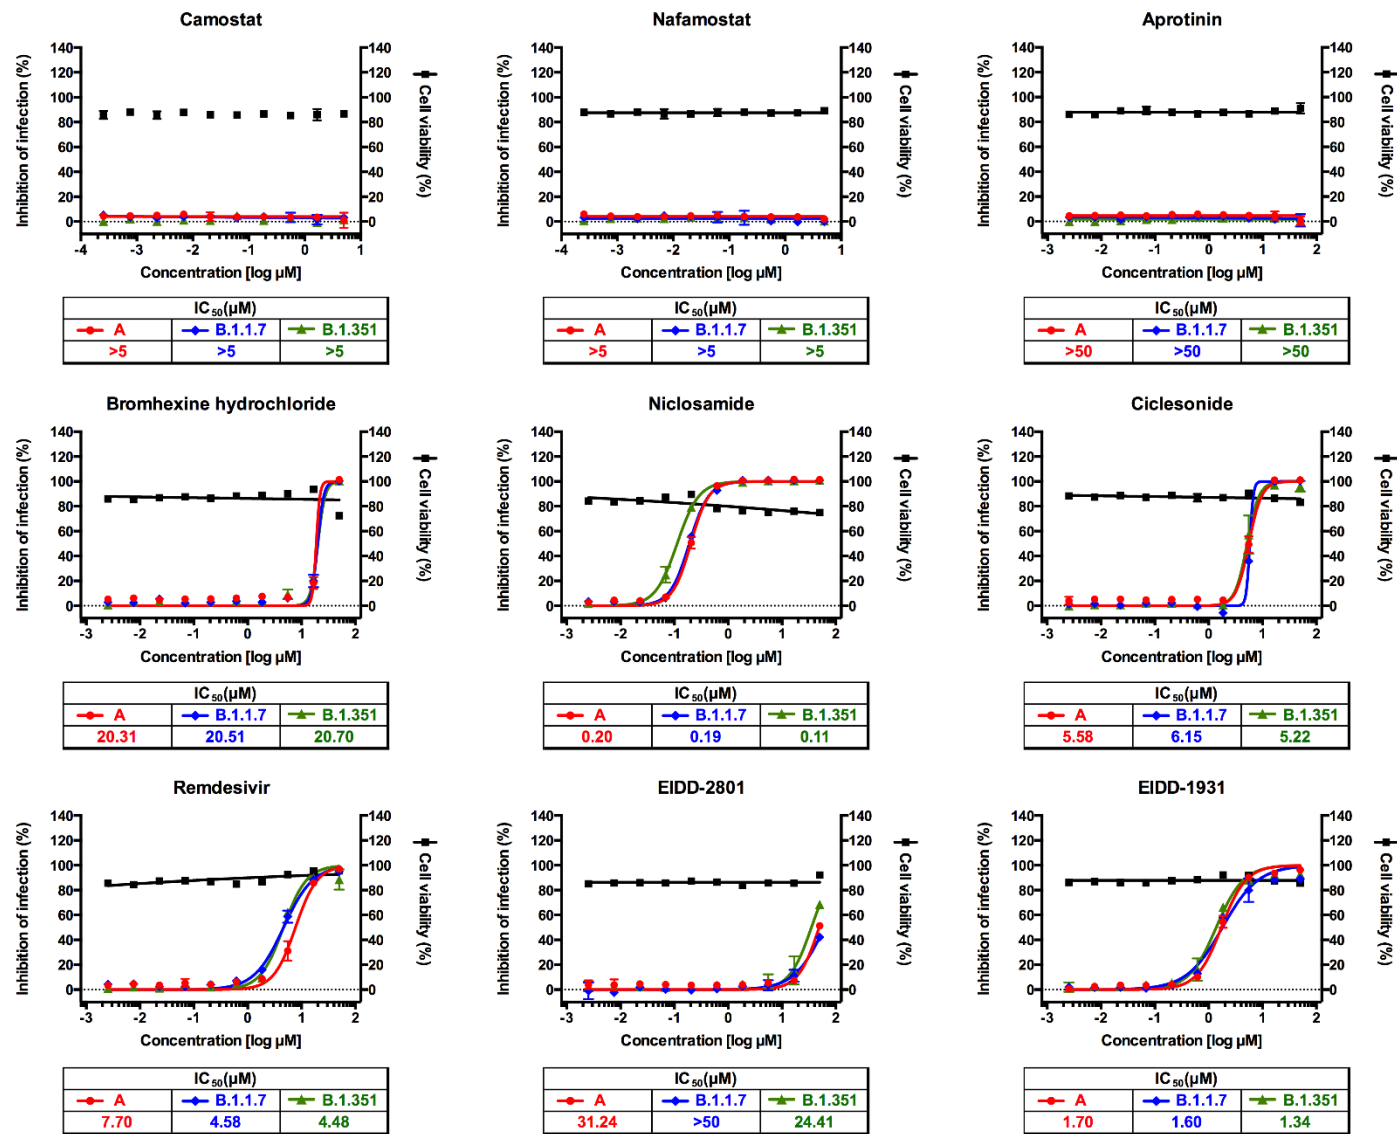

Figure 3

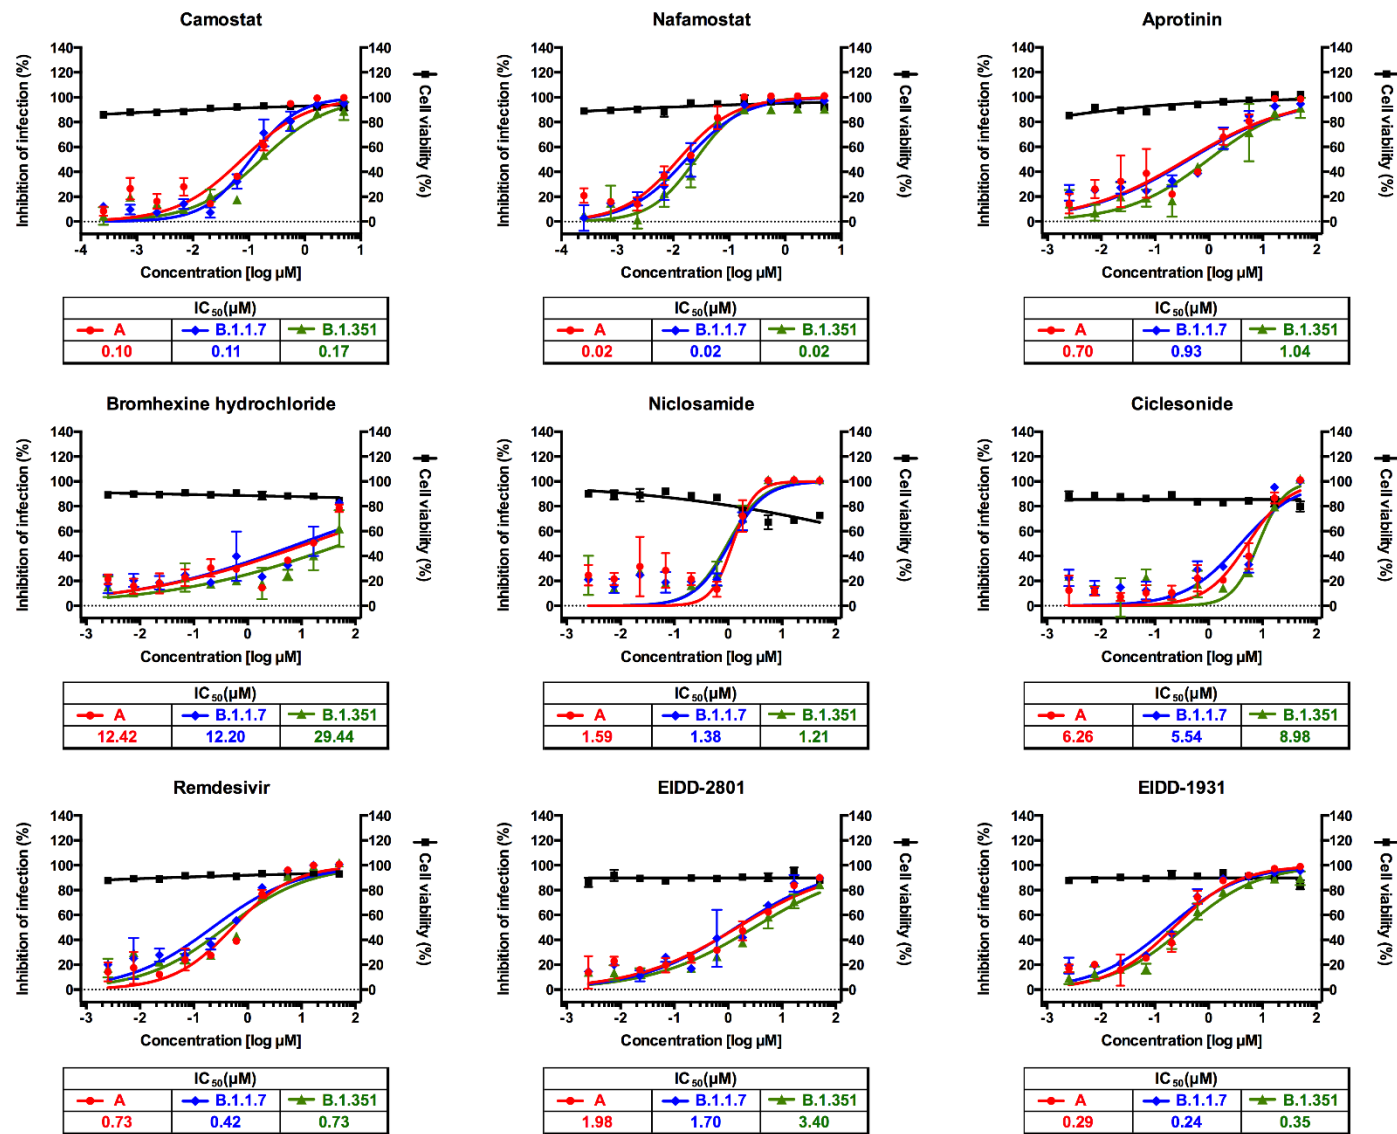

Source: https://www.biorxiv.org/content/10.1101/2021.04.06.438540v1.full.pdf
